# Supplementary material for: Advances in the Treatment of Implant-Associated Infections of the Pelvis: Eradication Rates, Recurrence of Infection, and Outcome
Source: MDPI journal article supplement (doi:10.3390/jcm12082854), 2023-04-13
Supplement: s1 [file s1]

**Table S1.** All detected bacteria and fungi, the first eight bacterial were detected in twice, all other bacteria and fungi were only detected once.

|                                     |
|-------------------------------------|
| <b>Bacteria</b>                     |
| <i>Citrobacter coseri</i>           |
| <i>Klebsiella pneumoniae</i>        |
| <i>Peptostreptococcus species</i>   |
| <i>Propioni species</i>             |
| <i>Proteus vulgaris</i>             |
| <i>Staphylococcus haemolyticus</i>  |
| <i>Staphylococcus lugdunensis</i>   |
| <i>Staphylococcus warneri</i>       |
| <i>Bacteroides fragilis</i>         |
| <i>Bacteroides thetaiotaomicron</i> |
| <i>Candida albicans</i>             |
| <i>Candida glabrata</i>             |
| <i>Citrobacter freundii</i>         |
| <i>Clostridium difficile</i>        |
| <i>Corynebacterium species</i>      |
| <i>Enterobacter amnigenus</i>       |
| <i>Enterobacter hormaechei</i>      |
| <i>Finnegoldia magna</i>            |
| <i>Klebsiella oxytoca</i>           |
| <i>Morganella morganii</i>          |
| <i>Peptostreptococcus prevotii</i>  |
| <i>Providencia vulgaris</i>         |
| <i>Serratia</i>                     |
| <i>Staphylococcus capitis</i>       |
| <i>Streptococcus agalactiae</i>     |
| <i>Streptococcus mitis</i>          |
| <i>Streptococcus parasanguinis</i>  |
| <i>Streptococcus salivarius</i>     |
